# Supplementary material for: Mechano-Sensing Channel PIEZO2 Enhances Invasive Phenotype in Triple-Negative Breast Cancer
Source: MDPI journal article supplement (doi:10.3390/ijms23179909), 2022-08-31
Supplement: s1 [file s1]

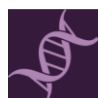

Article

# Supplementary Materials: Mechano-sensing channel PIEZO2 enhances invasive phenotype in triple-negative breast cancer

Eriko Katsuta <sup>1</sup>, Kazuaki Takabe <sup>1-6</sup>, Marija Vujcic <sup>7</sup>, Philip A. Gottlieb <sup>8</sup>, Tao Dai <sup>9</sup>, Arnaldo Mercado-Perez <sup>10</sup>, Arthur Beyder <sup>10</sup>, Qingfei Wang <sup>11</sup>, Mateusz Opyrchal <sup>7,11,\*</sup>

**Table S1.** qPCR primer sequence.

| Gene           | F                       | R                       |
|----------------|-------------------------|-------------------------|
| <i>PIEZO2</i>  | TGCACAGTCAAAGGCTATCAA   | ATGCTGTCCCAAATGATTCC    |
| <i>CTGF</i>    | AGGAGTGGGTGTGTGACGA     | CCAGGCAGTTGGCTCTAATC    |
| <i>ABCB1</i>   | TCACTATTGTTTCTAGCCCTTGG | ATGTATCGGAGCCGCTTG      |
| <i>ANKRD1</i>  | CGAATTCCGTGATATGCTTGA   | AAACATCCAGGTTTCCTCCA    |
| <i>CAT</i>     | GGATCACATACTTTCAAGCTGGT | TTTTTGATGCCCTGGTCAGT    |
| <i>CYR61</i>   | ACCCTTCTCCACTTGACCAG    | CTTGGCGCAGACCTTACAG     |
| <i>GPATCH4</i> | CCAAGCCCAACTTGCTGTAT    | TGCAGCTCTCCAAGTCTTTGT   |
| <i>LMNB2</i>   | CCCACTCCTCATCTCACCAT    | GCCCAAGCATCTTCTAAACCT   |
| <i>PTGS2</i>   | TGGGAAGCCTTCTCTAACCTC   | TCAGGAAGCTGCTTTTACCTT   |
| <i>TXN</i>     | TTACAGCCGCTCGTCAGA      | AAGGCTTCTGAAAAGCAGTC    |
| <i>WSB2</i>    | TGTGATTATGTGGGACCCCTA   | CAGATCTCAGTGAGCTAATGTGG |
| <i>GAPDH</i>   | AAGGTGAAGGTCGGAGTCAAC   | GGGGTCATTGATGGCAACAATA  |

**Table S2.** List of antibodies for western blot.

| Primary antibodies         | Company | species | type       | dilution | reference |
|----------------------------|---------|---------|------------|----------|-----------|
| SNAIL                      | CST     | rabbit  | monoclonal | 1:300    | 3879S     |
| Vimentin                   | CST     | rabbit  | monoclonal | 1:3,000  | 5741S     |
| E-cadherin                 | CST     | rabbit  | monoclonal | 1:1,000  | 3195S     |
| YAP/TAZ                    | CST     | rabbit  | monoclonal | 1:1,000  | 8418S     |
| p-TAZ                      | CST     | rabbit  | monoclonal | 1:300    | 59971S    |
| p-YAP                      | CST     | rabbit  | monoclonal | 1:1,000  | 13008S    |
| PI3K                       | CST     | rabbit  | monoclonal | 1:1,000  | 4249S     |
| Akt                        | CST     | rabbit  | monoclonal | 1:1,000  | 9272S     |
| p-Akt                      | CST     | rabbit  | monoclonal | 1:1,000  | 4060S     |
| GSK-3 $\beta$              | CST     | rabbit  | monoclonal | 1:1,000  | 12456S    |
| p-GSK-3 $\beta$            | CST     | rabbit  | monoclonal | 1:500    | 9336S     |
| GAPDH                      | CST     | rabbit  | monoclonal | 1:10,000 | 5174S     |
| YAP (for nuclear fraction) | CST     | rabbit  | monoclonal | 1:1,000  | 14074T    |
| $\beta$ -Tubulin           | CST     | rabbit  | monoclonal | 1:1,000  | 2128S     |
| Histone H3                 | CST     | rabbit  | monoclonal | 1:1,000  | 4499S     |

CST: Cell Signaling Technologies

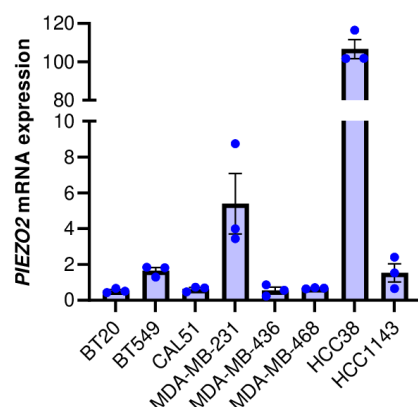

**Figure S1.** *PIEZO2* mRNA expression in triple-negative breast cancer (TNBC). *PIEZO2* mRNA expression in TNBC cell lines. Data was normalized with normal breast epithelial cell line, MCF10A as 1.

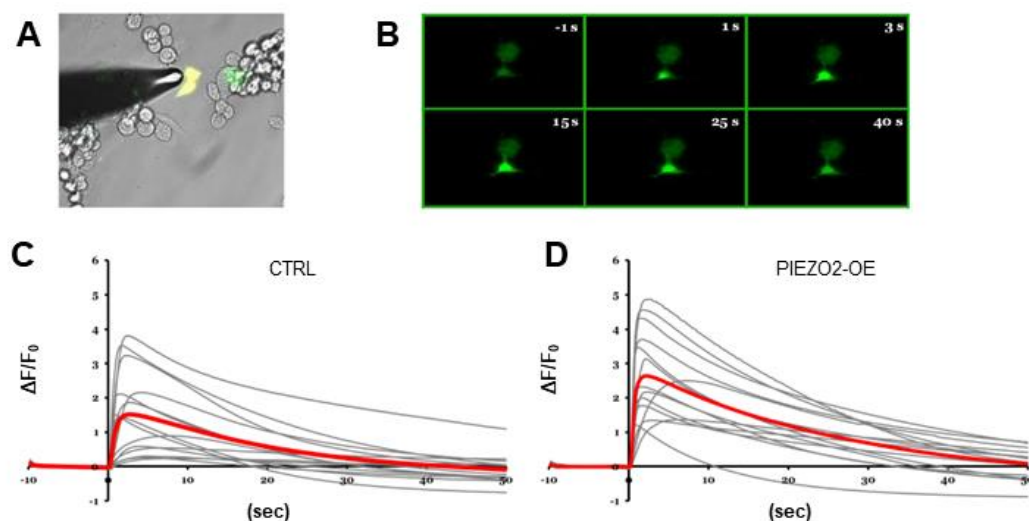

**Figure S2.** *PIEZO2* overexpression increases mechanically evoked calcium transients in MDA-MB-231 cells. MDA-MB-231 control (CTRL) or *PIEZO2* overexpressing cells (*PIEZO2*-OE) were transfected tdTomato for identification and GCaMP5, a genetically encoded indicator of cytoplasmic  $\text{Ca}^{2+}$  concentration. (A) Overlaid difference interference contrast (DIC)/epifluorescence image showing cells co-transfected with the red tdTomato and the green GCaMP5 (yellow). To the left, an electrically-driven blunted glass pipette is visualized. It delivers a 50 ms mechanical stimulus to the cells. Image magnification is 40x. (B) Stills from a green fluorescence time-lapse showing a representative experiment. The blunted pipette stimulates the cell at 0 sec. Typical fluorescence before mechanical stimulation (baseline,  $t < 0$  s), followed by stimulation ( $t > 0$  s), as the fluorescence sharply increases in response to the mechanical stimulus and returns to the pre-stimulation baseline. Image magnification is 40x. Normalized traces of GCaMP5 fluorescence for (C) CTRL and (D) *PIEZO2*-OE cells. Gray traces represent individual cells. Red traces represent the cumulative average. Negative time values are prior to mechanical stimulation. Positive time values are after mechanical stimulation.  $\Delta F/F_0$  = difference in fluorescence from baseline normalized to baseline.

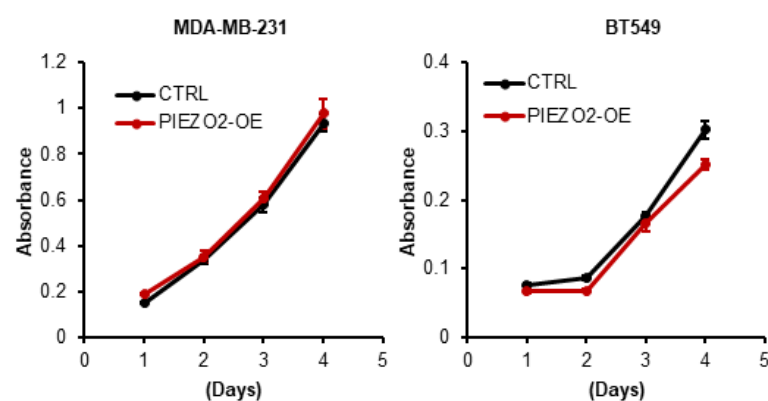

**Figure S3.** Proliferation of cells quantified by CCK8 in control (CTRL) and *PIEZO2* overexpressed (PIEZO2-OE) MDA-MB-231 and BT549 cells.  $n=6$ , each.

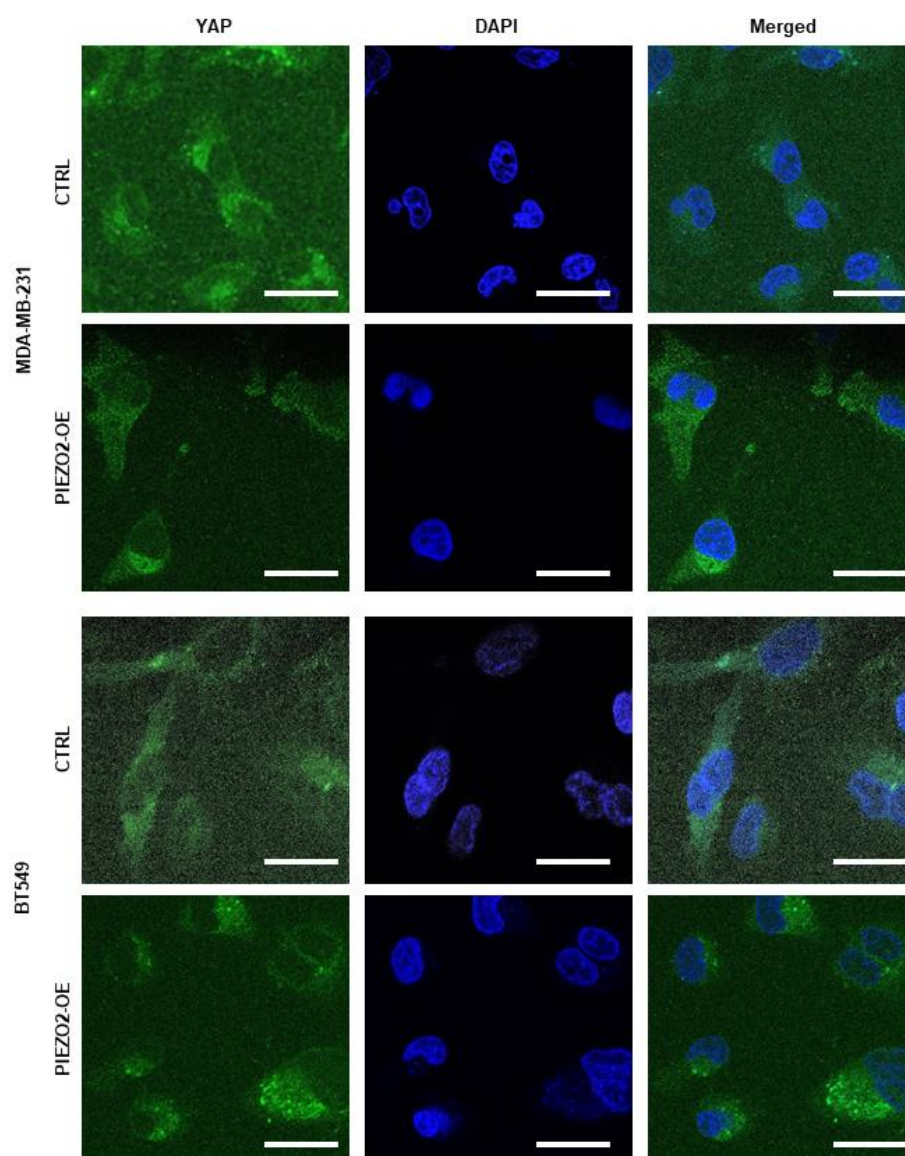

**Figure S4.** Representative images of YAP staining. YAP staining in control (CTRL) and *PIEZO2* overexpressed (PIEZO2-OE) cells of MDA-MB-231 and BT549. Scale bar indicates 25  $\mu\text{m}$ .
